# Supplementary material for: Mindfulness and Affect-Network Density: Does Mindfulness Facilitate Disengagement from Affective Experiences in Daily Life?
Source: Springer Nature journal article supplement (doi:10.1007/s12671-020-01335-4), 2020-02-21
Supplement: MOESM1 [file 17730160]

**Supplementary Materials: Additional Results**

This document contains additional results (Tables S1–S7) of all models that are described in the paper “Mindfulness and Affect-Network Density: Does Mindfulness Facilitate Disengagement from Affective Experiences in Daily Life?” which is published in the journal Mindfulness.

Table S1

*Descriptive Statistics and Inter-correlations Between Temporal Network Indices (OAD, NAD, PAD) and Contemporaneous Network Indices (OACD, PACD, NACD).*

| Network Density | *M* | *SD* | Range | 1 | 2 | 3 | 4 | 5 | 6 |
| --- | --- | --- | --- | --- | --- | --- | --- | --- | --- |
| 1 OAD | 0.10 | 0.02 | 0.06–0.15 |  |  |  |  |  |  |
| 2 NAD | 0.10 | 0.02 | 0.05–0.17 | .85** |  |  |  |  |  |
| 3 PAD | 0.10 | 0.02 | 0.05–0.16 | .88** | .49** |  |  |  |  |
| 4 OACD | 0.15 | 0.03 | 0.08–0.25 | .34** | .32** | .26** |  |  |  |
| 5 PACD | 0.21 | 0.05 | 0.05–0.38 | .11 | .21* | -.02 | .60** |  |  |
| 6 NACD | 0.17 | 0.06 | 0.07–0.35 | .18* | .21* | .12 | .63** | .32** |  |
| 7 PA-NACD | 0.16 | .05 | 0.07–0.29 | .33** | .24** | .33** | .79** | .15 | .17 |

*Note.* OAD = Overall affect network density; NAD = Negative affect network density; PAD = Positive affect network density; OACD = Overall affect contemporaneous network density; NACD = Negative affect contemporaneous network density; PACD = Positive affect contemporaneous network density; PA-NACD = Positive-negative affect contemporaneous network density.

* *p* < .05

** *p* <. 001

Table S2

*Overall Affect Contemporaneous Network Density (OACD) Predicted by Training, Individual Means of State Mindfulness Reports, and Previous Meditation Experience (PME)*

| Predictors | Step 1 | | | |  | Step 2 | | | |  | Step 3 | | | |
| --- | --- | --- | --- | --- | --- | --- | --- | --- | --- | --- | --- | --- | --- | --- |
|  | *B* (*SE*) | *p* | *β* | *R2* |  | *B* (*SE*) | *p* | *β* | *R2* |  | *B* (*SE*) | *p* | *β* | *R2* |
| Training | -.006 (.005) | .284 | -.097 | .027 |  | -.007 (.006) | .211 | -.115 | .040 |  | -.008 (.006) | .180 | -.135 | .073 |
| State Mindfulness | -.005 (.003) | .099 | -.151 |  |  | -.005 (.003) | .105 | -.148 |  |  | -.003 (.003) | .432 | -.079 |  |
| PME |  |  |  |  |  | .009 (.007) | .204 | .115 |  |  | -.001 (.011) | .927 | -.013 |  |
| Training x PME |  |  |  |  |  |  |  |  |  |  | .014 (.014) | .333 | .151 |  |
| State Mindfulness x PME |  |  |  |  |  |  |  |  |  |  | -.015 (.008) | .069 | -.181 |  |

*Note.* Step 1: Associations between OACD and mindfulness measures. Step 2: Controlled for PME. Step 3: Two-way interaction term between PME and each mindfulness measure. OACD = Overall affect contemporaneous network density; State Mindfulness = Grand-mean centered individual means of state Mindful Attention Awareness Scale reports; PME = Previous meditation experience (0 = no meditation or yoga experience; 1 = previous meditation or yoga experience); Training = condition allocation (0 = control condition; 1 = mindfulness training).

Table S3

*Positive and Negative Affect Contemporaneous Network Density (PACD and NACD) Predicted by Training, Individual Means of State Mindfulness Reports, and Previous Meditation Experience (PME)*

| Affect Network Density | |  | Step 1 | | | |  | Step 2 | | | |  | Step 3 | | | |
| --- | --- | --- | --- | --- | --- | --- | --- | --- | --- | --- | --- | --- | --- | --- | --- | --- |
| Outcome | Predictors |  | *B* (*SE*) | *p* | *β* | *R2* |  | *B* (*SE*) | *p* | *β* | *R2* |  | *B* (*SE*) | *p* | *β* | *R2* |
| PACD | Training |  | -.006 (.010) | .503 | -.061 | .008 |  | -.008 (.010) | .435 | -.072 | .013 |  | -.012 (.011) | .261 | -.115 | .051 |
| State Mindfulness |  | -.005 (.006) | .396 | -.078 |  |  | -.005 (.006) | .408 | -.076 |  |  | -.001 (.006) | .863 | -.017 |  |
| PME |  |  |  |  |  |  | .010 (.012) | .431 | .072 |  |  | -.015 (.020) | .458 | -.110 |  |
| Training x PME |  |  |  |  |  |  |  |  |  |  |  | .037 (.026) | .154 | .226 |  |
| Training x State Mindfulness |  |  |  |  |  |  |  |  |  |  |  | -.024 (.014) | .091 | -.170 |  |
| NACD | Training |  | .010 (.010) | .347 | .086 | .014 |  | .008 (.010) | .459 | .068 | .027 |  | .008 (.011) | .495 | .070 | .033 |
| State Mindfulness |  | -.004 (.006) | .466 | -.067 |  |  | -.004 (.006) | .485 | -.064 |  |  | -.002 (.006) | .776 | -.029 |  |
| PME |  |  |  |  |  |  | .017 (.013) | .201 | .117 |  |  | .013 (.021) | .555 | .088 |  |
| Training x PME |  |  |  |  |  |  |  |  |  |  |  | .005 (.027) | .860 | .028 |  |
| Training x State Mindfulness |  |  |  |  |  |  |  |  |  |  |  | -.012 (.015) | .411 | -.083 |  |

*Note.* Step 1: Associations between PACD or NACD and mindfulness measures. Step 2: Controlled for PME. Step 3: Two-way interaction term between PME and each mindfulness measure. PACD = Positive affect contemporaneous network density; NACD = Negative affect contemporaneous network density; State Mindfulness = Grand-mean centered individual means of state Mindful Attention Awareness Scale reports; PME = Previous meditation experience (0 = no meditation or yoga experience; 1 = previous meditation or yoga experience); Training = condition allocation (0 = control condition; 1 = mindfulness training).

Table S4

*Interconnected Positive and Negative Affect Contemporaneous Network Density (PA-NACD) Predicted by Training, Individual Means of State Mindfulness Reports, and Previous Meditation Experience (PME)*

|  | Step 1 | | | |  | Step 2 | | | |  | Step 3 | | | |
| --- | --- | --- | --- | --- | --- | --- | --- | --- | --- | --- | --- | --- | --- | --- |
| Predictors | *B* (*SE*) | *p* | *β* | *R2* |  | *B* (*SE*) | *p* | *β* | *R2* |  | *B* (*SE*) | *p* | *β* | *R2* |
| Training | -.011 (.006) | .074 | -.162 | .039 |  | -.012 (.006) | .062 | -.171 | .043 |  | -.013 (.007) | .079 | -.180 | .057 |
| State Mindfulness | -.006 (.004) | .116 | -.142 |  |  | -.006 (.004) | .121 | -.141 |  |  | -.004 (.004) | .369 | -.091 |  |
| PME |  |  |  |  |  | .006 (.008) | .487 | .063 |  |  | -.001 (.013) | .945 | -.010 |  |
| Training x PME |  |  |  |  |  |  |  |  |  |  | .009 (.017) | .597 | .083 |  |
| State Mindfulness x PME |  |  |  |  |  |  |  |  |  |  | -.012 (.009) | .205 | -.127 |  |

*Note.* Step 1: Associations between PA-NACD and mindfulness measures. Step 2: Controlled for PME. Step 3: Two-way interaction term between PME and each mindfulness measure. PA-NACD = Interconnected positive and negative affect contemporaneous network density; State Mindfulness = Grand-mean centered individual means of state Mindful Attention Awareness Scale reports; PME = Previous meditation experience (0 = no meditation or yoga experience; 1 = previous meditation or yoga experience); Training = condition allocation (0 = control condition; 1 = mindfulness training).

Table S5

*Overall Affect Network Density (OAD) Predicted by Training, Individual Means of State Mindfulness Reports, and Previous Meditation Experience (PME)*

|  | Step 2 | | | |  | Step 3 | | | |
| --- | --- | --- | --- | --- | --- | --- | --- | --- | --- |
| Predictors | *B* (*SE*) | *β* | *p* | R2 |  | *B* (*SE*) | *β* | *p* | R2 |
| Training | -.004 (.004) | -.104 | .265 | .017 |  | -.002 (.004) | -.045 | .652 | .061 |
| State Mindfulness | -.001 (.002) | -.066 | .472 |  |  | .001 (.002) | .034 | .733 |  |
| PME | -.003 (.005) | -.051 | .577 |  |  | .002 (.008) | .039 | .801 |  |
| Training x OME |  |  |  |  |  | -.009 (.010) | -.151 | .353 |  |
| State Mindfulness x OME |  |  |  |  |  | -.011 (.005) | -.209 | .038 |  |

*Note.* Step 2: Controlled for PME. Step 3: Two-way interaction term between PME and each mindfulness measure. OAD = Overall affect network density; State Mindfulness = Grand-mean centered individual means of state Mindful Attention Awareness Scale reports; PME = Previous meditation experience (0 = no previous meditation experience; 1 = previous meditation experience); Training = condition allocation (0 = control condition; 1 = mindfulness training).

Table S6

*Positive and Negative Affect Network Density (PAD and NAD) Predicted by Training, Individual Means of State Mindfulness Reports, and Previous Meditation Experience (PME)*

| Affect Network Density | |  | Step 2 | | | |  | Step 3 | | | |
| --- | --- | --- | --- | --- | --- | --- | --- | --- | --- | --- | --- |
| Outcomes | Predictors |  | *B* (*SE*) | *β* | *p* | R2 |  | *B* (*SE*) | *β* | *p* | R2 |
| PAD | Training |  | -.006 (.004) | -.137 | .141 | .024 |  | -.003 (.005) | -.066 | .504 | .059 |
| State Mindfulness |  | -.002 (.002) | -.089 | .331 |  |  | -.000 (.003) | -.012 | .907 |  |
| PME |  | -.002 (.006) | -.024 | .791 |  |  | .009 (.010) | .380 | .137 |  |
| Training x PME |  |  |  |  |  |  | -.017 (.012) | -.233 | .155 |  |
| State Mindfulness x PME |  |  |  |  |  |  | -.009 (.006) | -.143 | .155 |  |
| NAD | Training |  | -.002 (.004) | -.038 | .684 | .007 |  | -.000 (.004) | -.008 | .935 | .046 |
| State Mindfulness |  | -.001 (.002) | -.022 | .810 |  |  | .002 (.002) | .075 | .460 |  |
| PME |  | -.004 (.005) | -.066 | .474 |  |  | -.005 (.009) | -.079 | .616 |  |
| Training x PME |  |  |  |  |  |  | -.001 (.011) | -.019 | .906 |  |
| State Mindfulness x PME |  |  |  |  |  |  | -.013 (.006) | -.222 | .029 |  |

*Note.* Step 2: Controlled for PME. Step 3: Two-way interaction term between PME and each mindfulness measure. PAD = positive affect network density; NAD = negative affect network density; State Mindfulness = Grand-mean centered individual means of state Mindful Attention Awareness Scale reports; PME = Previous meditation experience (0 = no previous meditation experience; 1 = previous meditation experience); Training = condition allocation (0 = control condition; 1 = mindfulness training).

Table S7

|  | Step 1: Main effects | | | | | | | | |  | Step 2: Adding Interaction Effects | | | | | |
| --- | --- | --- | --- | --- | --- | --- | --- | --- | --- | --- | --- | --- | --- | --- | --- | --- |
|  | Training | | | State Mindfulness | | | PME | | |  | State Mindfulness X PME | | | Training X PME | | |
| Density | *B (SE)* | β | *p* | *B (SE)* | β | *p* | *B (SE)* | β | *p* |  | *B (SE)* | β | *p* | *B (SE)* | β | *p* |
| Happy | -.010 (.006) | -.149 | .105 | -.000 (.004) | -.004 | .964 | -.009 (.008) | -.099 | .276 |  | -.016 (.009) | -.178 | .073 | -.021 (.016) | -.198 | .206 |
| Excited | -.002 (.005) | -.035 | .710 | .001 (.003) | .027 | .773 | .003 (.007) | .040 | .663 |  | -.013 (.008) | -.163 | .107 | -.017 (.014) | -.187 | .241 |
| Relaxed | -.008 (.005) | -.129 | .148 | **-.011 (.003)** | **-.304** | **.001** | -.000 (.007) | -.003 | .976 |  | -.008 (.008) | -.096 | .325 | -.011 (.014) | -.122 | .427 |
| Satisfied | -.004 (.005) | -.066 | .474 | .001 (.003) | .017 | .851 | -.008 (.007) | -.104 | .254 |  | -.002 (.008) | -.023 | .822 | -.009 (.015) | -.101 | .528 |
| Angry | -.001 (.006) | -.010 | .911 | -.003 (.003) | -.092 | .318 | .002 (.008) | .021 | .823 |  | -.007 (.009) | -.083 | .419 | -.005 (.016) | -.056 | .729 |
| Anxious | -.006 (.006) | -.099 | .282 | -.002 (.003) | -.054 | .551 | .013 (.008) | .154 | .092 |  | **-.019 (.008)** | **-.218** | **.029** | -.019 (.015) | -.189 | .224 |
| Depressed | -.003 (.006) | -.049 | .597 | -.000 (.003) | -.012 | .896 | -.006 (.008) | -.066 | .474 |  | -.002 (.009) | -.025 | .803 | .017 (.016) | .169 | .294 |
| Sad | .003 (.006) | .041 | .653 | .004 (.004) | .099 | .278 | -.015 (.008) | -.164 | .071 |  | -.014 (.009) | -.155 | .121 | .022 (.017) | .205 | .192 |

*Single Affect Network Density Predicted by Training, Individual Means of State Mindfulness Reports, and Previous Meditation Experience*

*Note.* Step 1: Controlled for PME. Step 2: Two-way interaction term between PME and each mindfulness measure. State Mindfulness = Grand-mean centered individual means of state Mindful Attention Awareness Scale reports; PME = Previous meditation experience (0 = no meditation or yoga experience; 1 = previous meditation or yoga experience); Training = condition allocation (0 = control condition; 1 = mindfulness training).
